# Supplementary material for: Motor Vehicle Crash and Hospital Charges in Front- and Rear-Seated Restrained and Unrestrained Adult Motor Vehicle Occupants
Source: MDPI journal article supplement (doi:10.3390/ijerph192013674), 2022-10-21
Supplement: s1 [file s1]

**Table S1.** Median Hospital Charge for Front-Seated and Rear-Seated Occupants by Restraint Status, and Total Charges for Front and Rear-Seated Occupants, Crash Outcome Data Evaluation System, 2016-2017.

|                                                        | <i>Front-Seated Occupants</i> |                          | <i>Rear-Seated Occupants</i> |                          | <i>Total</i>                 |                          |
|--------------------------------------------------------|-------------------------------|--------------------------|------------------------------|--------------------------|------------------------------|--------------------------|
|                                                        | <i>(median, range in \$)</i>  |                          | <i>(median, range in \$)</i> |                          | <i>(median, range in \$)</i> |                          |
|                                                        | <i>Restrained</i>             | <i>Unrestrained</i>      | <i>Restrained</i>            | <i>Unrestrained</i>      | <i>All Front-Seated</i>      | <i>All Rear-Seated</i>   |
| <b>Study population</b>                                |                               |                          |                              |                          |                              |                          |
| <i>Occupant characteristics</i>                        |                               |                          |                              |                          |                              |                          |
| <b>Age</b>                                             |                               |                          |                              |                          |                              |                          |
| 18-20                                                  | 2,301 (1,185, 4,200)          | 3,929 (1,669, 12,058)    | 1,955 (1,133, 3,828)         | 3,171 (1,404, 8,826)     | 2,105 (1,206, 4,395)         | 2,146 (1,201, 4,917)     |
| 21-24                                                  | 2,068 (1,283, 4,210)          | 4,350 (1,909, 12,254)    | 1,957 (1,236, 3,636)         | 2,796 (1,344, 6,993)     | 2,150 (1,305, 4,443)         | 2,131 (1,312, 4,371)     |
| 25-34                                                  | 2,167 (1,302, 4,399)          | 3,355 (1,741, 10,347)    | 1,993 (1,235, 3,731)         | 2,298 (1,341, 5,854)     | 2,193 (1,312, 4,564)         | 2,104 (1,267, 4,197)     |
| 35-44                                                  | 2,257 (1,377, 4,364)          | 3,571 (1,501, 10,820)    | 2,069 (1,253, 3,829)         | 2,363 (1,341, 5,285)     | 2,264 (1,376, 4,476)         | 2,150 (1,291, 4,209)     |
| 45-54                                                  | 2,279 (1,423, 4,560)          | 3,245 (1,601, 16,449)    | 2,262 (1,297, 4,240)         | 2,240 (1,366, 5,746)     | 2,292 (1,413, 4,628)         | 2,317 (1,328, 4,801)     |
| 55-64                                                  | 2,453 (1,434, 5,165)          | 3,920 (1,657, 5,684)     | 2,385 (1,328, 4,620)         | 2,549 (1,497, 5,816)     | 2,479 (1,423, 5,142)         | 2,462 (1,401, 5,247)     |
| 65-74                                                  | 3,075 (1,674, 6,701)          | 14,940 (4,489, 45,998)   | 2,416 (1,375, 5,635)         | 3,870 (1,658, 8,195)     | 3,090 (1,684, 6,878)         | 2,812 (1,388, 5,839)     |
| 75-84                                                  | 3,335 (1,751, 8,567)          | 5,750 (2,062, 10,352)    | 3,636 (2,190, 7,166)         | 2,723 (2,190, 5,870)     | 3,353 (1,741, 8,643)         | 3,513 (2,153, 7,134)     |
| 85+                                                    | 4,482 (2,181, 13,307)         | 2,883 (2,262, 7,030)     | 4,804 (1,950, 11,525)        | 4,991 (1,828, 26,537)    | 4,386 (2,145, 13,195)        | 4,729 (1,950, 11,525)    |
| <b>Sex/Gender</b>                                      |                               |                          |                              |                          |                              |                          |
| Male                                                   | 2,316 (1,377, 4,758)          | 4,736 (1,941, 16,578)    | 3,920 (1,741, 13,255)        | 2,636 (1,358, 8,167)     | 2,366 (1,387, 5,091)         | 2,198 (1,287, 4,953)     |
| Female                                                 | 2,313 (1,376, 4,871)          | 3,493 (1,740, 9,968)     | 3,647 (1,679, 9,565)         | 2,465 (1,397, 5,544)     | 2,338 (1,379, 4,841)         | 2,247 (1,323, 4,651)     |
| <i>Injury severity and health care characteristics</i> |                               |                          |                              |                          |                              |                          |
| <b>Disposition of admitted patients</b>                |                               |                          |                              |                          |                              |                          |
| Home, no care                                          | 2,304 (1,394, 4,524)          | 3,242 (1,675, 8,432)     | 2,105 (1,262, 3,991)         | 2,378 (1,344, 5,477)     | 2,366 (1,419, 4,737)         | 2,181 (1,295, 4,366)     |
| Home, home health care                                 | 51,337 (28,663, 164,019)      | 72,749 (42,417, 128,661) | 40,844 (13,623, 91,752)      | 62,775 (26,326, 186,770) | 57,653 (32,650, 102,564)     | 44,578 (23,252, 108,086) |
| Other acute care facility                              | 11,440 (4,594, 34,475)        | 26,672 (9,066, 119,985)  | 12,350 (4,421, 43,821)       | 26,864 (7,557, 157,479)  | 14,162 (5,371, 59,046)       | 14,855 (5,775, 103,843)  |

|                                |                          |                           |                          |                          |                          |                          |
|--------------------------------|--------------------------|---------------------------|--------------------------|--------------------------|--------------------------|--------------------------|
| Skilled Nursing                | 74,344 (28,465, 147,116) | 110,920 (59,912, 228,872) | 45,951 (31,005, 89,818)  | 79,042 (49,160, 182,848) | 83,980 (42,294, 167,475) | 62,995 (37,617, 119,310) |
| Died                           | 18,157 (4,241, 83,547)   | 14,426 (3,394, 68,812)    | 49,245 (15,987, 185,644) | 14,309 (5,014, 48,996)   | 16,439 (4,236, 77,033)   | 19,065 (6,457, 64,924)   |
| Other                          | 2,537 (1,196, 7,506)     | 6,976 (1,865, 18,513)     | 1,657 (870, 4,274)       | 2,211 (847, 7,379)       | 2,816 (1,257, 9,230)     | 1,701 (870, 4,551)       |
| <b>Injury severity</b>         |                          |                           |                          |                          |                          |                          |
| Uninjured                      | 2,007 (1,245, 3,666)     | 2,272 (1,333, 4,704)      | 1,866 (1,176, 3,311)     | 1,870 (1,201, 3,259)     | 2,016 (1,256, 3,709)     | 1,877 (1,188, 3,380)     |
| Minor                          | 2,409 (1,453, 4,745)     | 2,974 (1,602, 7,269)      | 2,153 (1,277, 4,101)     | 2,110 (1,231, 4,505)     | 2,434 (1,467, 4,895)     | 2,169 (1,278, 4,278)     |
| Moderate                       | 3,090 (1,584, 7,465)     | 3,895 (1,888, 10,043)     | 2,941 (1,676, 6,174)     | 3,663 (1,822, 7,826)     | 3,332 (1,663, 8,467)     | 3,110 (1,715, 6,751)     |
| Severe                         | 5,538 (2,164, 18,976)    | 18,282 (5,154, 54,894)    | 4,421 (1,907, 13,361)    | 19,935 (4,928, 51,899)   | 7,840 (2,601, 29,959)    | 10,304 (2,596, 35,464)   |
| Killed                         | 14,044 (3,594, 76,036)   | 11,186 (3,017, 48,320)    | 49,245 (49,245, 149,423) | 10,363 (3,788, 36,620)   | 12,513 (3,292, 65,580)   | 14,309 (6,349, 49,121)   |
| Unknown Severity               | 2,053 (1,287, 4,033)     | 2,847 (1,587, 7,525)      | 1,638 (881, 3,146)       | 2,495 (1,644, 4,035)     | 2,110 (1,299, 4,322)     | 1,741 (1,071, 3,272)     |
| <b>Vehicle characteristics</b> |                          |                           |                          |                          |                          |                          |
| <b>Vehicle body type</b>       |                          |                           |                          |                          |                          |                          |
| Car                            | 2,383 (1,429, 4,839)     | 3,737 (1,741, 12,010)     | 2,145 (1,270, 4,154)     | 2,433 (1,338, 5,600)     | 2,389 (1,433, 4,905)     | 2,205 (1,308, 4,531)     |
| Light Truck                    | 2,378 (1,401, 4,768)     | 4,270 (1,811, 13,103)     | 2,140 (1,264, 4,203)     | 2,673 (1,418, 7,792)     | 2,390 (1,410, 4,867)     | 2,184 (1,290, 4,632)     |
| Large truck                    | 2,485 (1,438, 6,158)     | 4,647 (2,151, 14,903)     | 2,948 (1,873, 4,675)     | 2,916 (2,916, 2,916)     | 2,599 (1,478, 6,475)     | 2,916 (2,149, 3,759)     |
| Other                          | 2,053 (1,287, 4,033)     | 3,053 (1,701, 7,581)      |                          | 2,042 (1,164, 9,646)     | 3,069 (1,695, 7,536)     | 2,879 (1,514, 4,982)     |
| <b>Vehicle year</b>            |                          |                           |                          |                          |                          |                          |
| <1994                          | 2,195 (1,336, 4,452)     | 3,125 (1,674, 8,370)      | 2,008 (1,240, 3,659)     | 2,100 (1,235, 4,956)     | 2,488 (1,447, 5,593)     | 2,094 (1,258, 4,068)     |
| 1994-1997                      | 2,641 (1,516, 5,863)     | 7,242 (3,001, 21,539)     | 2,420 (1,445, 7,184)     | 3,321 (1,577, 10,074)    | 2,831 (1,562, 6,709)     | 2,613 (1,505, 6,742)     |
| 1998-2004                      | 2,459 (1,448, 5,205)     | 4,958 (2,180, 17,556)     | 2,226 (1,267, 4,503)     | 3,180 (1,458, 10,454)    | 2,548 (1,475, 5,615)     | 2,407 (1,344, 5,308)     |
| 2005-2008                      | 2,332 (1,375, 4,773)     | 4,447 (1,814, 13,734)     | 2,237 (1,308, 4,255)     | 3,005 (1,673, 7,379)     | 2,411 (1,394, 5,140)     | 2,394 (1,400, 5,304)     |
| 2009-2011                      | 2,354 (1,389, 4,694)     | 4,122 (1,803, 11,763)     | 2,205 (1,275, 4,479)     | 2,790 (1,411, 6,180)     | 2,400 (1,406, 4,931)     | 2,363 (1,365, 5,476)     |
| 2012 or newer                  | 2,364 (1,434, 4,682)     | 3,491 (1,741, 11,130)     | 2,080 (1,238, 3,940)     | 2,209 (1,259, 5,073)     | 2,406 (1,449, 4,892)     | 2,143 (1,257, 4,267)     |
| Unknown                        | 1,691 (1,399, 3,430)     | 3,793 (1,985, 12,013)     | 1,980 (1,649, 2,312)     | 1,480 (1,480, 1,480)     | 3,745 (1,913, 13,182)    | 1,649 (1,649, 2,312)     |
| <b>Crash characteristics</b>   |                          |                           |                          |                          |                          |                          |
| <b>Ejection</b>                |                          |                           |                          |                          |                          |                          |
| Not ejected                    | 1,916 (1,271, 3,522)     | 3,365 (1,680, 9,457)      | 2,131 (1,244, 4,163)     | 2,426 (1,365, 5,746)     | 2,407 (1,433, 4,957)     | 2,184 (1,295, 4,486)     |
| Partially ejected              | 3,300 (1,534, 9,905)     | 4,074 (1,842, 14,351)     | 5,763 (1,299, 12,823)    | 5,244 (2,331, 21,521)    | 4,735 (2,002, 15,974)    | 3,712 (2,331, 12,411)    |

|                                |                       |                       |                      |                        |                       |                        |
|--------------------------------|-----------------------|-----------------------|----------------------|------------------------|-----------------------|------------------------|
| Ejected                        | 6,877 (2,688, 18,978) | 5,760 (2,279, 20,374) | 1,933 (1,756, 1,933) | 14,016 (6,410, 68,776) | 7,698 (2,626, 26,047) | 9,765 (2,809, 35, 723) |
| Unknown                        | 2,380 (1,417, 4,818)  | 3,000 (1,669, 12,653) | 2,345 (1,240, 3,669) | 1,741 (1,126, 3,863)   | 2,065 (1,306, 3,956)  | 2,345 (1,239, 4,089)   |
| <b>Airbag deployment</b>       |                       |                       |                      |                        |                       |                        |
| Yes                            | 3,156 (1,641, 8,308)  | 4,196 (1,953, 13,241) | 2,623 (1,394, 7,295) | 4,588 (1,394, 14,278)  | 3,222 (1,663, 8,602)  | 2,769 (1,391, 8,194)   |
| No                             | 2,271 (1,385, 4,449)  | 3,895 (1,675, 12,723) | 2,116 (1,262, 4,069) | 2,495 (1,380, 6,124)   | 2,291 (1,388, 4,536)  | 2,186 (1,288, 4,411)   |
| Unknown                        | 1,900 (1,116, 3,687)  | 3,322 (1,755, 9,341)  | NA                   | 2,466 (1,540, 9,646)   | 2,904 (1,584, 7,940)  | 2,509 (1,428, 6,464)   |
| <b>Alcohol involvement</b>     |                       |                       |                      |                        |                       |                        |
| Yes                            | 4,677 (1,910, 12,245) | 9,129 (3,428, 25,673) | 2,623 (1,394, 7,295) | 2,466 (1,540, 9,646)   | 5,383 (2,160, 14,998) | NA                     |
| No                             | 2,433 (1,449, 4,972)  | 3,733 (1,811, 11,859) | 2,116 (1,262, 4,069) | 1,949 (1,164, 3,730)   | 2,549 (1,489, 5,442)  | 2,097 (1,164, 3,633)   |
| Unknown                        | 2,136 (1,322, 4,181)  | 3,001 (1,559, 7,869)  | 2,138 (1,265, 4,148) | 2,534 (1,382, 6,363)   | 2,173 (1,336, 4,324)  | 2,232 (1,312, 4,771)   |
| <b>Speed involvement</b>       |                       |                       |                      |                        |                       |                        |
| Yes                            | 2,998 (1,484, 7,664)  | 8,386 (2,603, 24,909) | 2,575 (1,306, 6,059) | 4,587 (1,819, 15,362)  | 3,447 (1,601, 10,173) | 3,098 (1,505, 9,783)   |
| No                             | 2,337 (1,409, 4,647)  | 3,400 (1,718, 9,746)  | 2,106 (1,263, 4,035) | 2,398 (1,341, 5,592)   | 2,401 (1,434, 4,945)  | 2,186 (1,299, 4,462)   |
| <b>Payment Characteristics</b> |                       |                       |                      |                        |                       |                        |
| <b>Source of payment</b>       |                       |                       |                      |                        |                       |                        |
| Private                        | 2,380 (1,405, 4,885)  | 3,878 (1,833, 12,356) | 2,163 (1,243, 4,364) | 2,728 (1,401, 6,993)   | 2,456 (1,434, 5,252)  | 2,259 (1,308, 5,175)   |
| Governmental source            | 3,020 (1,616, 7,187)  | 5,798 (2,047, 24,925) | 2,348 (1,318, 4,606) | 2,461 (1,400, 6,573)   | 3,160 (1,661, 8,820)  | 2,407 (1,355, 5,541)   |
| Workers Compensation           | 2,017 (1,323, 3,591)  | 2,485 (1,434, 5,994)  | 2,105 (1,376, 3,482) | 1,867 (1,200, 3,147)   | 2,046 (1,335, 3,676)  | 1,987 (1,314, 3,287)   |
| Self-pay/uninsured             | 2,270 (1,370, 4,299)  | 3,144 (1,672, 7,705)  | 2,068 (1,268, 3,798) | 2,398 (1,251, 5,749)   | 2,361 (1,393, 4,648)  | 2,203 (1,300, 4,310)   |
| Other                          | 2,247 (1,320, 4,437)  | 4,075 (1,809, 9,688)  | 2,013 (1,058, 3,305) | 2,186 (1,660, 6,593)   | 2,298 (1,340, 4,607)  | 2,106 (1,163, 3,938)   |
| Unknown                        | 2,171 (1,601, 3,918)  | 3,086 (1,764, 6,584)  | 2,034 (1,555, 3,540) | 2,363 (1,475, 4,949)   | 2,239 (1,622, 4,160)  | 2,088 (1,500, 3,891)   |
